# Supplementary material for: Reducing meat consumption in developed and transition countries to counter climate change and biodiversity loss: a review of influence factors
Source: Springer Nature journal article supplement (doi:10.1007/s10113-016-1057-5), 2016-10-06
Supplement: 10113_2016_1057_MOESM1_ESM.pdf [file 10113_2016_1057_MOESM1_ESM.pdf]

Electronic Supplementary Material

Reducing meat consumption in developed and transition countries to counter climate change and biodiversity loss: a review of influence factors

Prof. Dr. Susanne Stoll-Kleemann (corresponding author)

Uta Schmidt, M.Sc.

Ernst-Moritz-Armdt University of Greifswald, Chair of Sustainability Science and Applied Geography, Friedrich-Ludwig-Jahn-Str. 16, 17487 Greifswald, Germany

susanne.stoll-kleemann@uni-greifswald.de; uta.schmidt@uni-greifswald.de

| First author          | Year | Title                                                                                                                                                     | Method | Data | Category | No. of factors | Factors                       |
|-----------------------|------|-----------------------------------------------------------------------------------------------------------------------------------------------------------|--------|------|----------|----------------|-------------------------------|
| <b>ISI Web Search</b> |      |                                                                                                                                                           |        |      |          |                |                               |
| Antonetti             | 2014 | Feelings that make a difference: How guilt and pride convince consumers of the effectiveness of sustainable consumption choices                           | QN     | EmP  | OB       | 2              | ECD, PBC                      |
| Axsen                 | 2013 | Developing sustainability-oriented values: Insights from households in a trial of plug-in hybrid electric vehicles                                        | QL     | EmP  | OB       | 4              | VA, HT, N, FE                 |
| Axsen                 | 2013 | Social influence and consumer preference formation for pro-environmental technology: The case of a UK workplace electric-vehicle study                    | QL     | EmP  | OB       | 2              | HT, N                         |
| Barker                | 2009 | Educational attainment, perceived control and quality of women's diets                                                                                    | QL     | EmP  | DB       | 2              | PBC, KS                       |
| Barr                  | 2002 | Perceptions and practices of self-defined current vegetarian, former vegetarian, and nonvegetarian women                                                  | QN     | EmP  | M        | 3              | VA, KS, HT                    |
| Barr                  | 2006 | Sustainable lifestyles: Framing environmental action in and around the home                                                                               | QN     | EmP  | OB       | 5              | VA, KS, HT, N, FE             |
| Barr                  | 2011 | Helping People Make Better Choices: Exploring the behaviour change agenda for environmental sustainability                                                | QL     | EmP  | OB       | 7              | VA, ECD, KS, HT, PBC, N, FE   |
| Barrena               | 2010 | Frequency of consumption and changing determinants of purchase decision: from attributes to values in the organic food market                             | QL     | EmS  | DB       | 3              | VA, ECD, HT                   |
| Beardsworth           | 1992 | The vegetarian option. Varieties, conversions, motives and careers                                                                                        | QL     | EmP  | M        | 5              | VA, ECD, KS, HT, N            |
| Bobić                 | 2012 | Personality Traits, Motivation and bone health in vegetarians                                                                                             | QN     | EmP  | M        | 2              | VA, HT                        |
| Brown                 | 2009 | Motivations of consumers that use local, organic fruit and vegetable box schemes in Central England and Southern France                                   | QN     | EmP  | DB       | 1              | VA                            |
| Cabieses              | 2013 | At the edge of individual cognitive-behavioural policies: how to walk the public health path to effectively improve population health?                    | R      | EmP  | M        | 1              | FE                            |
| Cordts                | 2014 | Consumer Response to Negative Information on Meat Consumption in Germany                                                                                  | QN     | EmP  | M        | 4              | VA, KS, HT                    |
| Darmon                | 2008 | Does social class predict diet quality?                                                                                                                   | R      | EmS  | DB       | 2              | KS, HT                        |
| de Boer               | 2014 | "Meatless days" or "less but better"? Exploring strategies to adapt Western meat consumption to health and sustainability challenges                      | QN     | EmP  | M        | 4              | PBC, KS, HT, FE               |
| Deckers               | 2009 | Vegetarianism, sentimental or ethical?                                                                                                                    | R      | EmS  | M        | 2              | VA, ECD                       |
| Defila                | 2014 | Sustainable consumption. An unwieldy object of research                                                                                                   | R      | EmS  | OB       | 8              | VA, PBC, HT, N, I, CR, FE, EP |
| Ding                  | 2011 | Habit, BSE, and the Dynamics of Beef Consumption                                                                                                          | QN     | EmP  | M        | 1              | HT                            |
| Dyett                 | 2013 | Vegan lifestyle behaviors. An exploration of congruence with health-related beliefs and assessed health indices                                           | QN     | EmP  | M        | 2              | VA, HT                        |
| Egea                  | 2013 | Toward Consumption Reduction: An Environmentally Motivated Perspective                                                                                    | QN     | EmP  | OB       | 4              | VA, DPT, KS                   |
| Ejabou                | 2013 | The effect of using consumption taxes on foods to promote climate friendly diets - The case of Denmark                                                    | QN     | EmP  | M        | 2              | EP, FE                        |
| Ericson               | 2014 | Mindfulness and sustainability                                                                                                                            | R      | EmS  | OB       | 3              | VA, ECD, PBC, N               |
| Fessler               | 2003 | Disgust sensitivity and meat consumption: a test of an emotivist account of moral vegetarianism                                                           | QL     | EmP  | M        | 2              | VA, ECD                       |
| Filippi               | 2010 | The Brain Functional Networks Associated to Human and Animal Suffering Differ among Omnivores, Vegetarians and Vegans                                     | QN     | EmP  | M        | 1              | ECD                           |
| Fischer               | 2014 | Competencies for and beyond Sustainable Consumption: An Educational Contribution to the Debate                                                            | R      | EmS  | OB       | 5              | PBC, KS, N, EP, FE            |
| Fox                   | 2008 | Health, ethics and environment: A qualitative study of vegetarian motivations                                                                             | QL     | EmP  | M        | 1              | VA                            |
| Girod                 | 2014 | Climate policy through changing consumption choices: Options and obstacles for reducing greenhouse gas emissions                                          | R      | EmS  | OB       | 5              | PBC, KS, HT, EP, FE           |
| Greenebaum            | 2012 | Veganism, Identity and the Quest for Authenticity                                                                                                         | QL     | EmP  | M        | 2              | VA, I                         |
| Hanss                 | 2013 | Promoting purchases of sustainable groceries: An intervention study                                                                                       | QN     | EmP  | OB       | 2              | PBC, KS                       |
| Haverstock            | 2012 | To eat or not to eat. A comparison of current and former animal product limiters                                                                          | QN     | EmP  | M        | 4              | VA, HT, I, N                  |
| Heiskanen             | 2010 | Low-carbon communities as a context for individual behavioural change                                                                                     | QL     | EmP  | OB       | 3              | PBC, N, FE                    |
| Hoek                  | 2011 | Replacement of meat by meat substitutes. A survey on person- and product-related factors in consumer acceptance                                           | QN     | EmP  | M        | 2              | VA, HT                        |
| Hoffman               | 2013 | Differences between health and ethical vegetarians. Strength of conviction, nutrition knowledge, dietary restriction, and duration of adherence           | QN     | EmP  | M        | 1              | VA                            |
| Howell                | 2013 | It's not (just) "the environment, stupid!" Values, motivations, and routes to engagement of people adopting lower-carbon lifestyles                       | QL     | EmP  | OB       | 3              | VA, ECD, N                    |
| Hupkova               | 2009 | Structural changes in the beef meat demand in Slovakia and demand elasticity estimation                                                                   | QN     | EmP  | M        | 3              | VA, DPF, KS                   |
| Jin                   | 2003 | The effect of the BSE outbreak in Japan on consumers' preferences                                                                                         | QN     | EmP  | M        | 1              | KS                            |
| Joyce                 | 2012 | Reducing the environmental impact of dietary choice: perspectives from a behavioural and social change approach.                                          | R      | EmS  | M        | 1              | VA                            |
| Kenyon                | 1998 | Attitudes towards meat-eating in vegetarian and non-vegetarian teenage girls in England - an ethnographic approach                                        | QL     | EmP  | M        | 5              | VA, ECD, KS, HT, N            |
| Kim                   | 2009 | Measurement and communication of greenhouse gas emissions from US food consumption via carbon calculators                                                 | R      | EmP  | DB       | 1              | KS                            |
| Lanfranco             | 2014 | Household demand elasticities for meat products in Uruguay                                                                                                | QN     | EmP  | M        | 3              | DPF, HT, FE                   |
| Larsson               | 2002 | Lifestyle-related characteristics of young low-meat consumers and omnivores in Sweden and Norway                                                          | QN     | EmP  | M        | 3              | DPF, N, I                     |
| Larsson               | 2003 | Veganism as status passage - The process of becoming a vegan among youths in Sweden                                                                       | QN     | EmP  | M        | 1              | VA                            |
| Latvala               | 2012 | Diversifying meat consumption patterns: Consumers' self-reported past behaviour and intentions for change                                                 | QN     | EmP  | M        | 1              | HT                            |
| Lea                   | 2006 | Consumers' readiness to eat a plant-based diet                                                                                                            | QN     | EmP  | M        | 4              | KS, HT, DPF, FE               |
| Lea                   | 2006 | Public views of the benefits and barriers to the consumption of a plant-based diet                                                                        | QN     | EmP  | M        | 4              | DPF, KS, HT, FE               |
| Lindeman              | 2000 | Measurement of ethical food choice motives                                                                                                                | QN     | EmP  | M        | 2              | VA, HT                        |
| Lindeman              | 2001 | Food choice ideologies: the modern manifestations of normative and humanist views of the world                                                            | QN     | EmP  | DB       | 4              | VA, HT, N, CR                 |
| Mäkinieni             | 2011 | Ethical and unethical food. Social representations among Finnish, Danish and Italian students                                                             | QL     | EmP  | DB       | 1              | N                             |
| Mäkinieni             | 2014 | Barriers to climate-friendly food choices among young adults in Finland                                                                                   | QN     | EmP  | M        | 3              | VA, PBC, HT                   |
| Marquart              | 2003 | Whole grain health claims in the USA and other efforts to increase whole-grain consumption                                                                | R      | EmS  | DB       | 5              | PBC, KS, HT, FE, EP           |
| McGee                 | 2008 | Perceptions of factors influencing healthful food consumption behavior in the lower Mississippi delta. Focus group findings                               | QL     | EmP  | DB       | 4              | PBC, KS, CR, DPF              |
| Moreira               | 2004 | Educational and economic determinants of food intake in Portuguese adults: a cross-sectional survey                                                       | QN     | EmP  | DB       | 2              | KS, HT                        |
| MorenoGomez           | 2012 | Clustering of lifestyle factors in Spanish university students: the relationship between smoking, alcohol consumption, physical activity and diet quality | QN     | EmP  | M        | 1              | HT                            |

Electronic Supplementary Material

Reducing meat consumption in developed and transition countries to counter climate change and biodiversity loss: a review of influence factors

Prof. Dr. Susanne Stoll-Kleemann (corresponding author)

Uta Schmidt, M.Sc.

Ernst-Moritz-Armdt University of Greifswald, Chair of Sustainability Science and Applied Geography, Friedrich-Ludwig-Jahn-Str. 16, 17487 Greifswald, Germany

susanne.stoll-kleemann@uni-greifswald.de; uta.schmidt@uni-greifswald.de

| First author | Year | Title                                                                                                                                      | Method | Data | Category | No. of factors | Factors                         |
|--------------|------|--------------------------------------------------------------------------------------------------------------------------------------------|--------|------|----------|----------------|---------------------------------|
| Morrison     | 2003 | Expenditure on different categories of meat in Greece: the influence of changing tastes                                                    | QN     | EmP  | M        | 2              | HT, CR                          |
| Nath         | 2010 | Gendered fare? A qualitative investigation of alternative food and masculinities                                                           | QL     | EmP  | DB       | 2              | KS, N                           |
| Paisley      | 2008 | Dietary change: What are the responses and roles of significant others?                                                                    | QL     | EmP  | DB       | 2              | N, DPF                          |
| Palaniswamy  | 2003 | Vegetarianism and human health                                                                                                             | R      | EmS  | M        | 1              | KS                              |
| Peattie      | 2010 | Green consumption: behavior and norms                                                                                                      | R      | EmS  | OB       | 8              | VA, ECD, DPF, PBC, KS, HT, N, I |
| Phillips     | 1999 | Complex systems model of dietary choice with implications for improving diets and promoting vegetarianism                                  | R      | T    | M        | 3              | PBC, KS, HT                     |
| Pollard      | 1998 | Motives underlying healthy eating: Using the food choice questionnaire to explain variation in dietary intake                              | QN     | EmP  | DB       | 3              | VA, KS, HT                      |
| Pribis       | 2010 | Beliefs and attitudes toward vegetarian lifestyle across generations                                                                       | QN     | EmP  | M        | 1              | VA                              |
| Redman       | 2014 | Transforming sustainable food and waste behaviors by realigning domains of knowledge in our education system                               | QN     | EmP  | DB       | 1              | KS                              |
| Reid         | 2010 | Theorizing the meso level: the household as a crucible of pro-environmental behaviour                                                      | R      | EmS  | OB       | 3              | PBC, N, I                       |
| Revell       | 2013 | Promoting sustainability and pro-environmental behaviour through local government programmes: examples from London, UK                     | QL     | EmP  | OB       | 1              | FE                              |
| Richardson   | 1933 | Current attitudes and future influences on meat consumption in the UK                                                                      | QN     | EmP  | M        | 5              | VA, KS, HT, N, DPF              |
| Rothgerber   | 2013 | Real Men Don't Eat (Vegetable) Quiche: Masculinity and the Justification of Meat Consumption                                               | QN     | EmP  | M        | 3              | VA, N, I                        |
| Rothgerber   | 2014 | RA comparison of attitudes toward meat and animals among strict and semi-vegetarians                                                       | QN     | EmP  | M        | 2              | VA, ECD                         |
| Rothgerber   | 2014 | Horizontal hostility among non-meat eaters                                                                                                 | QN     | EmP  | M        | 2              | I, N                            |
| Santos       | 1996 | Influences on meat avoidance among British students                                                                                        | QL     | EmP  | M        | 5              | VA, ECD, PBC, HT, N             |
| Schor        | 2005 | Prices and quantities: Unsustainable consumption and the global economy                                                                    | R      | EmS  | DB       | 2              | EP, FE                          |
| Schösler     | 2012 | Can we cut out the meat of the dish? Constructing consumer-oriented pathways towards meat substitution                                     | QN     | EmP  | M        | 3              | KS, HT, CR                      |
| Sneijder     | 2009 | Normalizing ideological food choice and eating practices. Identity work in online discussions on veganism                                  | QL     | EmP  | M        | 2              | I, N                            |
| Southerton   | 2013 | Habits, routines and temporalities of consumption: From individual behaviours to the reproduction of everyday practices                    | R      | EmS  | OB       | 2              | ECD, HT                         |
| Sparks       | 2002 | The role of moral judgments within expectancy-value-based attitude-behavior models                                                         | QN     | EmP  | OB       | 3              | VA, PBC, N                      |
| Thøgersen    | 2014 | Unsustainable consumption. Basic causes and implications for policy                                                                        | R      | EmS  | OB       | 8              | VA, ECD, KS, PBC, HT, N, EP, FE |
| Tobler       | 2011 | Eating green. Consumers' willingness to adopt ecological food consumption behaviors                                                        | QN     | EmP  | M        | 3              | VA, PBC, HT                     |
| van Wezemael | 2010 | Consumer perceptions of beef healthiness: results from a qualitative study in four European countries                                      | QL     | EmP  | M        | 3              | VA, PBC, N                      |
| Vartanian    | 2015 | Impression management and food intake. Current directions in research                                                                      | R      | EmS  | M        | 2              | N, I                            |
| Verbeke      | 2001 | A fresh meat almost ideal demand system incorporating negative TV press and advertising impact                                             | QN     | EmP  | M        | 2              | ECD, KS                         |
| Verbeke      | 2008 | Impact of communication on consumers' food choice                                                                                          | R      | EmS  | DB       | 2              | KS, HT                          |
| Vranken      | 2014 | Curbing global meat consumption: Emerging evidence of a second nutrition transition                                                        | QN     | EmP  | M        | 2              | CR, FE                          |
| Walley       | 2014 | A review of UK consumers' purchasing patterns, perceptions and decision making factors for poultry meat                                    | R      | EmS  | M        | 4              | VA, KS, HT, FE                  |
| Wiig         | 2008 | The art of grocery shopping on a food stamp budget: factors influencing the food choices of low-income women as they try to make ends meet | QN/QL  | EmP  | M        | 3              | VA, KS, HT                      |
| Worsley      | 1998 | Teenage vegetarianism. Prevalence, social and cognitive contexts                                                                           | QN     | EmP  | M        | 7              | VA, ECD, PBC, KS, HT, N, I      |

Electronic Supplementary Material

Reducing meat consumption in developed and transition countries to counter climate change and biodiversity loss: a review of influence factors

Prof. Dr. Susanne Stoll-Kleemann (corresponding author)

Uta Schmidt, M.Sc.

Ernst-Moritz-Armdt University of Greifswald, Chair of Sustainability Science and Applied Geography, Friedrich-Ludwig-Jahn-Str. 16, 17487 Greifswald, Germany

susanne.stoll-kleemann@uni-greifswald.de; uta.schmidt@uni-greifswald.de

| First author                | Year | Title                                                                                                                                                                                        | Method | Data | Category | No. of factors | Factors                                     |
|-----------------------------|------|----------------------------------------------------------------------------------------------------------------------------------------------------------------------------------------------|--------|------|----------|----------------|---------------------------------------------|
| <b>Snowball Methodology</b> |      |                                                                                                                                                                                              |        |      |          |                |                                             |
| Ajzen                       | 1991 | The theory of planned behaviour                                                                                                                                                              | R      | EmS  | OB       | 3              | VA, PBC, N                                  |
| Bailey                      | 2014 | Livestock - Climate change's forgotten sector. Global public opinion on meat and dairy consumption                                                                                           | QN     | EmP  | M        | 1              | KS                                          |
| Bastian                     | 2012 | Don't mind meat? The denial of mind to animals used for human consumption                                                                                                                    | QN     | EmP  | M        | 2              | VA, ECD                                     |
| Benning                     | 2011 | Subventionen für die industrielle Fleischerzeugung in Deutschland. BUND-Recherche zur staatlichen Förderung der Schweine- und Geflügelproduktion in den Jahren 2008 und 2009                 | R      | EmS  | M        | 1              | EP                                          |
| Beardsworth                 | 1991 | Vegetarianism, veganism, and meat-avoidance: Recent trends and findings                                                                                                                      | QL     | EmP  | M        | 1              | VA                                          |
| Beardsworth                 | 2004 | Meat consumption and meat avoidance among young people. An 11-year longitudinal study                                                                                                        | QN     | EmP  | M        | 2              | ECD, HT                                     |
| Bergmann                    | 2010 | Cognitive dissonance and individuals' response strategies as a basis for audience segmentation to reduce factory farmed meat consumption                                                     | QL     | EmP  | M        | 3              | VA, KS, ECD                                 |
| Briesbroek                  | 2013 | On the nature of barriers to climate change adaptation                                                                                                                                       | R      | EmS  | OB       | 4              | EP, FE, PBC                                 |
| Buschmann                   | 2013 | Ökonomische Instrumente für eine Senkung des Fleischkonsums in Deutschland.                                                                                                                  | R      | EmS  | M        | 1              | EP                                          |
| Cialdini                    | 1990 | A focus theory of normative conduct: Recycling the concept of norms to reduce littering in public places                                                                                     | QN     | EmP  | OB       | 1              | N                                           |
| Cordts                      | 2013 | Imageprobleme beeinflussen den Konsum. Von unbekümmerten Fleischessern, Flexitariern und (Lebensabschnitts-)Vegetariern                                                                      | QN     | EmP  | M        | 2              | DPF, HT                                     |
| Dagevos                     | 2013 | Sustainability and meat consumption: is reduction realistic?                                                                                                                                 | QN     | EmP  | M        | 4              | VA, HT, EP, FE                              |
| Darnton                     | 2008 | Reference Report: An overview of behaviour change models and their uses                                                                                                                      | R      | T    | OB       | 11             | VA, HT, PBC, ECD, KS, DPF, N, I, CR, EP, FE |
| Darnton                     | 2013 | Influencing behaviours. A technical guide to the ISM tool                                                                                                                                    | R      | T    | OB       | 11             | VA, HT, PBC, ECD, KS, DPF, N, I, CR, EP, FE |
| de Boer                     | 2013 | Climate change and meat eating: An inconvenient couple?                                                                                                                                      | QN     | EmP  | M        | 3              | VA, KS, HT                                  |
| Dibb                        | 2014 | Let's talk about meat: changing dietary behaviour for the 21st century                                                                                                                       | R      | EmS  | M        | 7              | VA, HT, PBC, ECD, KS, CR, FE                |
| Festinger                   | 1957 | Theory of Cognitive Dissonance                                                                                                                                                               | R      | T    | OB       | 1              | ECD                                         |
| Furst                       | 1996 | Food choice. A conceptual model of the process                                                                                                                                               | QL     | EmP  | DB       | 7              | VA, HT, PBC, KS, DPF, N, FE                 |
| Garnett                     | 2014 | Appetite for change. Social, economic and environmental transformations in China's food system                                                                                               | R      | EmS  | M        | 4              | VA, DPF, EP, FE                             |
| Garnett                     | 2015 | Policies and actions to shift eating patterns: What works? A review of the evidence of the effectiveness of interventions aimed at shifting diets in more sustainable and healthy directions | R      | EmS  | M        | 7              | VA, HT, ECD, KS, N, EP, FE                  |
| Gedrich                     | 2003 | Determinants of nutritional behaviour: a multitude of levers for successful intervention?                                                                                                    | R      | EmS  | DB       | 5              | VA, ECD, HT, N, FE                          |
| Gifford                     | 2014 | Personal and social factors that influence pro-environmental concern and behaviour: A review                                                                                                 | R      | EmS  | OB       | 8              | VA, ECD, PBC, DPF, KS, N, I, CR             |
| Gifford                     | 2011 | The dragons of inaction. Psychological barriers that limit climate change mitigation and adaptation                                                                                          | R      | EmS  | OB       | 7              | VA, ECD, PBC, DPF, KS, N, I                 |
| Goldberg                    | 2002 | Personality traits and eating habits: The assessment of food preferences in a large community sample                                                                                         | QN     | EmP  | DB       | 2              | DPF, HT                                     |
| Graca                       | 2015 | Meat, beyond the plate. Data-driven hypotheses for understanding consumer willingness to adopt a more plant-based diet                                                                       | QN     | EmP  | M        | 4              | VA, ECD, HT                                 |
| Griskevicius                | 2010 | Going green to be seen: Status, reputation, and conspicuous conservation                                                                                                                     | QN     | EmP  | OB       | 1              | N                                           |
| Grunert                     | 2001 | Food-related lifestyle: A segmentation approach to European food consumers                                                                                                                   | R      | EmS  | DB       | 2              | VA, I                                       |
| Harmon-Jones                | 1999 | Cognitive dissonance: Progress on a pivotal theory in social psychology                                                                                                                      | R      | EmS  | OB       | 2              | VA, ECD                                     |
| Herman                      | 2008 | External cues in the control of food intake in humans: The sensory-normative distinction                                                                                                     | R      | T    | DB       | 1              | HT                                          |
| Higgs                       | 2015 | Social norms and their influence on eating behaviours                                                                                                                                        | R      | EmS  | DB       | 2              | N, I                                        |
| Hoek                        | 2004 | Food-related lifestyle and health attitudes of Dutch vegetarians, non-vegetarian consumers of meat substitutes, and meat consumers                                                           | QN     | EmP  | M        | 2              | VA, DPF                                     |
| Janda                       | 2001 | Vegetarianism: Toward a greater understanding                                                                                                                                                | QN/QL  | EmP  | M        | 5              | VA, ECD, HT, DPF, N                         |
| Jones                       | 2014 | The growing price gap between more and less healthy foods: Analysis of a novel longitudinal UK dataset                                                                                       | QN     | EmP  | DB       | 1              | FE                                          |
| Joy                         | 2005 | Humanistic psychology and animal rights: Reconsidering the boundaries of the humanistic ethic                                                                                                | R      | T    | M        | 3              | VA, ECD, N                                  |
| Keller                      | 2012 | Instrumente im Sinne einer nachhaltigen, klimafreundlichen Fleischproduktion                                                                                                                 | R      | EmS  | M        | 2              | EP, FE                                      |
| Keller                      | 2015 | Does personality influence eating styles and food choices? Direct and indirect effects                                                                                                       | QN     | EmP  | DB       | 2              | DPF, HT                                     |
| Laestadius                  | 2013 | Meat consumption and climate change: the role of non-governmental organizations                                                                                                              | QL     | EmP  | M        | 1              | N                                           |
| Laestadius                  | 2014 | We don't tell people what to do: An examination of the factors influencing NGO decisions to campaign for reduced meat consumption in light of climate change                                 | QL     | EmP  | M        | 3              | N, EP, FE                                   |
| Lea                         | 2001 | Influences on meat consumption in Australia                                                                                                                                                  | QN     | EmP  | M        | 3              | N, KS, HT                                   |
| Lea                         | 2008 | Australian consumers' food-related environmental beliefs and behaviours                                                                                                                      | QN     | EmP  | DB       | 2              | KS, ECD                                     |
| Leahy                       | 2010 | An estimate of the number of vegetarians in the world                                                                                                                                        | QN     | EmP  | M        | 2              | CR, EP                                      |
| Lewin                       | 1951 | Field theory in social sciences. Selected papers on group dynamics                                                                                                                           | R      | T    | OB       | 2              | HT, N                                       |
| Loewenstein                 | 2001 | Risk as feelings                                                                                                                                                                             | R      | T    | OB       | 1              | ECD                                         |
| Loughnan                    | 2014 | The psychology of eating animals                                                                                                                                                             | R      | EmS  | M        | 4              | VA, ECD, I, N                               |
| Loughnan                    | 2010 | The role of meat consumption in the denial of moral status and mind to meat animals                                                                                                          | QN     | EmP  | M        | 2              | VA, ECD                                     |
| McKenzie-Mohr               | 2000 | Promoting sustainable behavior: An introduction to community-based social marketing                                                                                                          | R      | EmS  | OB       | 1              | KS                                          |
| Noppers                     | 2014 | The adoption of sustainable innovations: Driven by symbolic and environmental motives                                                                                                        | QN     | EmP  | OB       | 3              | I, N, FE                                    |
| O'Riordan                   | 2015 | The challenges of seeking to change dietary behavior towards more sustainable consumption of livestock products                                                                              | R      | EmS  | M        | 5              | VA, HT, PBC, ECD, N                         |
| Piazza                      | 2015 | Rationalizing meat consumption. The 4Ns                                                                                                                                                      | QN     | EmP  | M        | 5              | VA, ECD, KS, N, HT                          |
| Povey                       | 2001 | Attitudes towards following meat, vegetarian and vegan diets: an examination of the role of ambivalence                                                                                      | QN     | EmP  | M        | 6              | VA, HT, PBC, KS, N, I                       |
| Rao                         | 2013 | Do healthier foods and diet patterns cost more than less healthy options? A systematic review and meta-analysis                                                                              | R      | EmS  | DB       | 2              | EP, FE                                      |
| Rauschmayer                 | 2012 | Transition to sustainability: Not only big, but deep                                                                                                                                         | R      | EmS  | DB       | 6              | VA, ECD, KS, N, I, EP                       |
| Ritson                      | 2001 | The Economics of food choice: Is price important?                                                                                                                                            | R      | EmS  | DB       | 1              | EP                                          |
| Rothgerber                  | 2014 | Efforts to overcome vegetarian-induced dissonance among meat eaters                                                                                                                          | QN     | EmP  | M        | 3              | VA, PBC, I                                  |
| Ruby                        | 2011 | Meat, morals, and masculinity                                                                                                                                                                | QN     | EmP  | M        | 2              | I, N                                        |
| Salonen                     | 2012 | Vegetarian diets: A way towards a sustainable society                                                                                                                                        | QN     | EmP  | M        | 3              | VA, HT, N                                   |

Electronic Supplementary Material

Reducing meat consumption in developed and transition countries to counter climate change and biodiversity loss: a review of influence factors

Prof. Dr. Susanne Stoll-Kleemann (corresponding author)

Uta Schmidt, M.Sc.

Ernst-Moritz-Armdt University of Greifswald, Chair of Sustainability Science and Applied Geography, Friedrich-Ludwig-Jahn-Str. 16, 17487 Greifswald, Germany

susanne.stoll-kleemann@uni-greifswald.de; uta.schmidt@uni-greifswald.de

| First author   | Year | Title                                                                                                                              | Method | Data | Category | No. of factors | Factors                   |
|----------------|------|------------------------------------------------------------------------------------------------------------------------------------|--------|------|----------|----------------|---------------------------|
| Schösler       | 2015 | Meat and masculinity among young Chinese, Turkish and Dutch adults in the Netherlands                                              | QN     | EmP  | M        | 2              | I, CR                     |
| Sexton         | 2013 | Market power, misconceptions, and modern agricultural markets                                                                      | R      | EmS  | DB       | 2              | EP, FE                    |
| Shepherd       | 2001 | Does taste determine consumption? Understanding the psychology of food choice                                                      | R      | EmS  | DB       | 5              | VA, PBC, HT, N, I         |
| Speer          | 2001 | The relationship between social cohesion and empowerment: Support and new implications for theory                                  | QN     | EmP  | OB       | 2              | PBC, N                    |
| Stoll-Kleemann | 2015 | The sustainability challenges of our meat and dairy diets                                                                          | R      | EmS  | M        | 5              | ECD, DPF, KS, EP, FE      |
| Triandis       | 1999 | Interpersonal behaviour                                                                                                            | R      | T    | OB       | 4              | VA, KS, HT, FE            |
| Tucker         | 2014 | The significance of sensory appeal for reduced meat consumption                                                                    | QL     | EmP  | M        | 5              | HT, DPF, KS, N, CR        |
| Twigg          | 1979 | Food for Thought: Purity and Vegetarianism                                                                                         | R      | EmS  | M        | 1              | N                         |
| Verain         | 2015 | Flexitarians: a range of sustainable food styles                                                                                   | QN     | EmP  | M        | 3              | N, DPF, VA                |
| Vinnari        | 2014 | A framework for sustainability transition: The case of plant-based diets                                                           | R      | EmS  | M        | 7              | VA, ECD, KS, HT, N, I, CR |
| Wansink        | 2007 | Mindless eating. The 200 daily food decisions we overlook                                                                          | QN     | EmP  | OB       | 4              | PBC, KS, HT, N            |
| Westhoek       | 2011 | The Protein Puzzle. The consumption and production of meat, dairy and fish in the European Union                                   | R      | EmS  | M        | 5              | T, KS, ECD, EP, FE        |
| Wilhelm        | 2005 | Nachhaltige Ernährung in der Ernährungskommunikation ausgewählter Institutionen<br>Qualitative Fallanalysen von Experteninterviews | QL     | EmP  | M        | 5              | I, KS, HT, FE, EP         |
| Withana        | 2012 | Study supporting the phasing out of environmentally harmful subsidies                                                              | R      | EmP  | M        | 1              | EP                        |
| Wyker          | 2010 | Behavioral change theories can inform the prediction of young adult's adoption of a plant-based diet                               | QN     | EmP  | M        | 4              | VA, PBC, KS, N            |

**Legend**

M = meat related, DB = dietary behaviour, OB = other behavior

R = Review, QL = Qualitative, QN = Qualitative

EmP = Empirical with primary data, EmS = Empirical with secondary data, T = Theoretical

VA = Values & Attitudes

ECD = Emotions & Cognitive Dissonance

PBC = Perceived Behaviour Control

KS = Knowledge & Skills

DPF = Demographic Factors, Personal Traits & Family Customs

N = Social Norms, Social Roles & Relationships

I = Social Identity & Lifestyles

HT = Habits & Tastes

CR = Culture & Religion

EP = Economic & Political Aspects

FE = Food Environment
